# Supplementary material for: A molecular descriptor of a shallow potential energy surface for the ground state to achieve narrowband thermally activated delayed fluorescence emission
Source: Royal Society of Chemistry journal article supplement (doi:10.1039/d3cp05875a), 2024-01-01
Supplement: d3cp05875a1.pdf [file d3cp05875a1.pdf]

## *Supplementary Information*

A molecular descriptor of shallow potential energy surface for ground state to achieve narrowband thermally activated delayed fluorescence emission

Jiaqiang Zhao<sup>1</sup>, Huanling Liu<sup>2</sup>, Jianzhong Fan<sup>2\*</sup>, Qingfang Mu<sup>2\*</sup>

1. School of Physics and Electronic Information, Weifang University, Weifang 261061, China
2. Shandong Province Key Laboratory of Medical Physics and Image Processing Technology, Institute of Materials and Clean Energy, School of Physics and Electronics, Shandong Normal University, Jinan 250014, China.

### **Corresponding Author**

\*Author to whom correspondence should be addressed.

E-mail: [fanjianzhongvip@163.com](mailto:fanjianzhongvip@163.com) and [qingfangmusdnu@163.com](mailto:qingfangmusdnu@163.com)

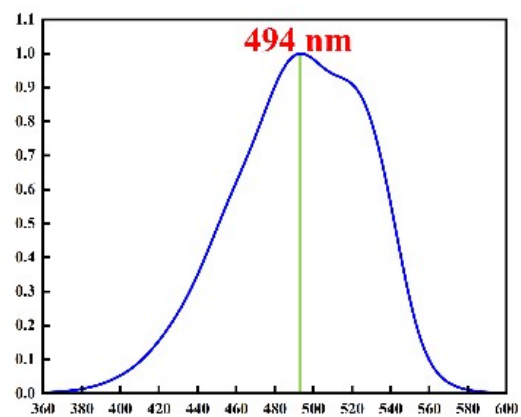

**2,3-POA**

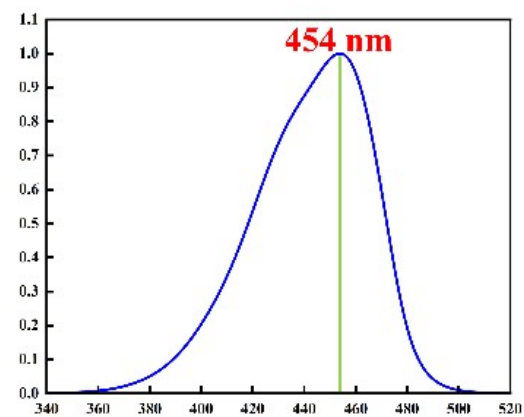

**2,3-DPA**

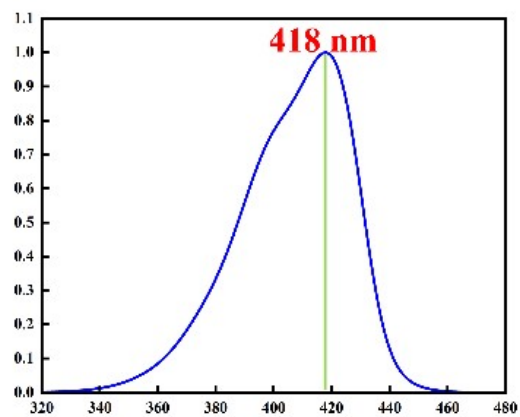

**2,3-CZ**

Figure S1. Calculated absorption spectra in toluene.

## 2,3-POA

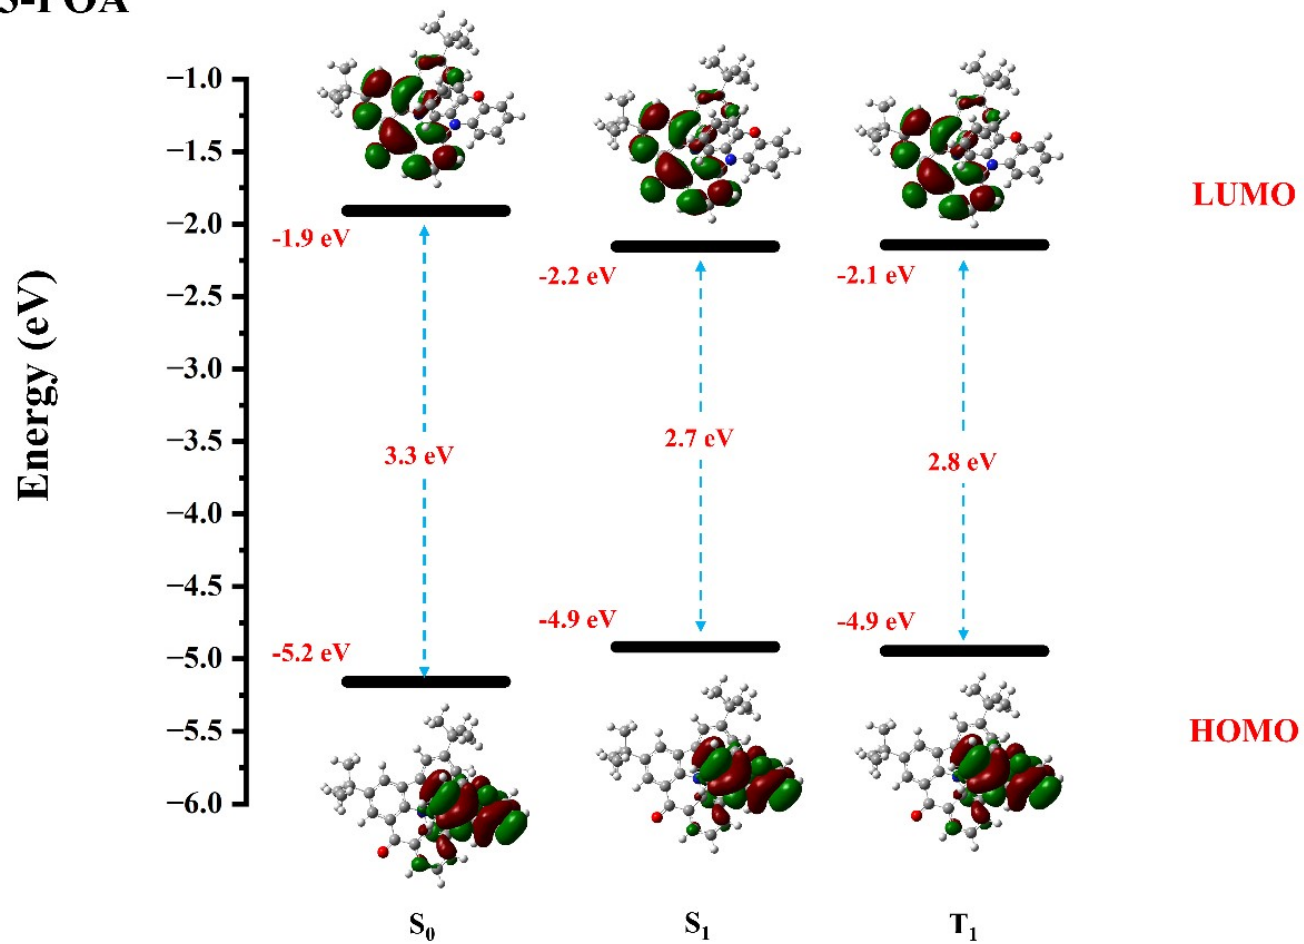

Figure S2. The orbital transition information for 2,3-POA of the  $S_0$ ,  $S_1$  and  $T_1$  states in toluene.

## 2,3-DPA

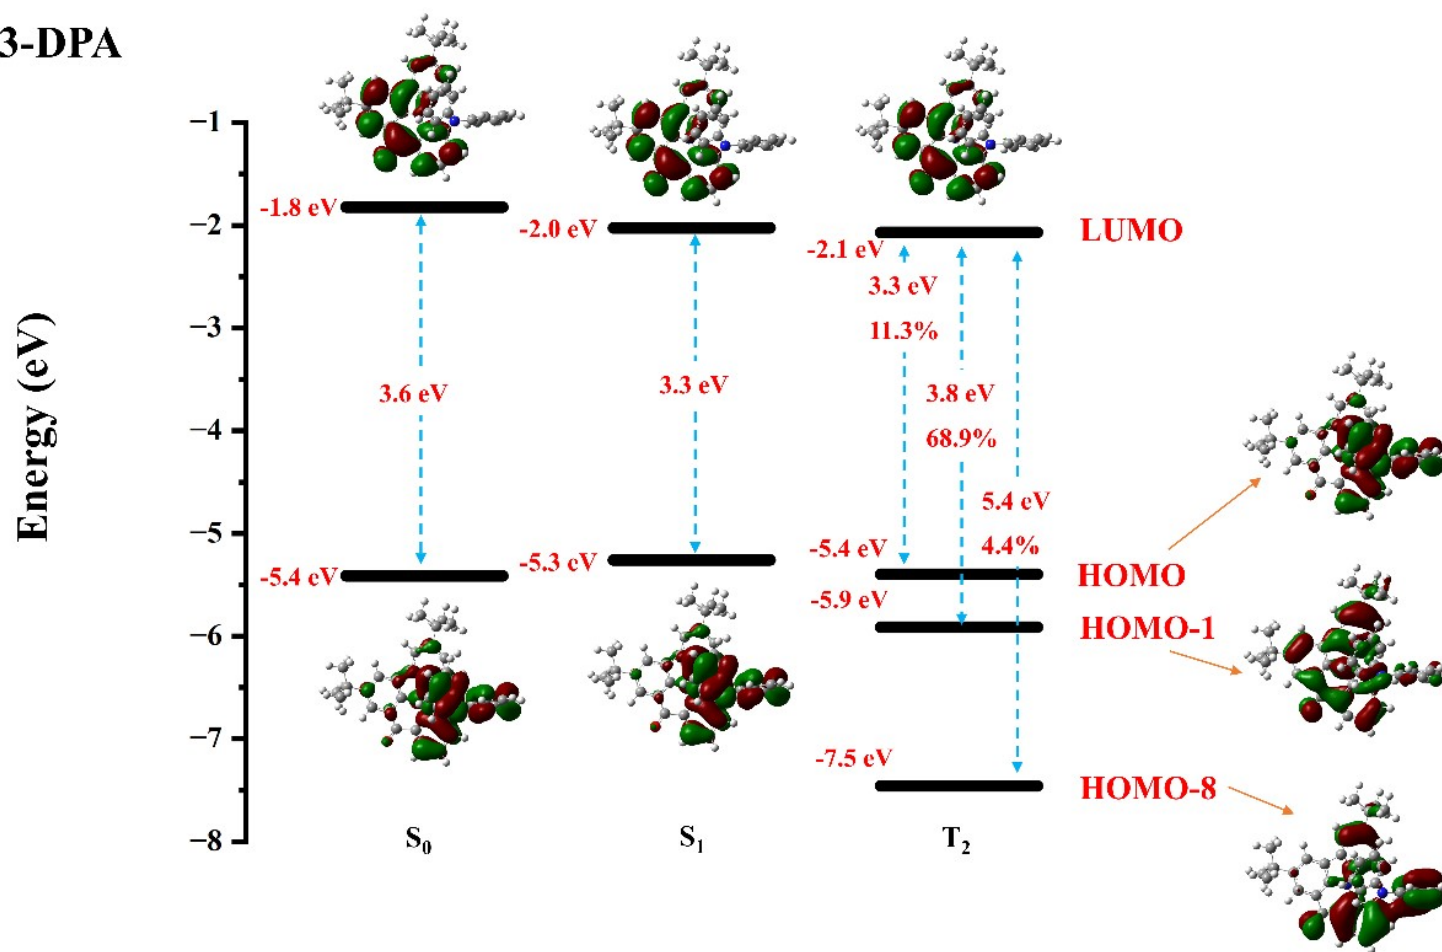

Figure S3. The orbital transition information for 2,3-DPA of the S<sub>0</sub>, S<sub>1</sub> and T<sub>2</sub> states in toluene.

## 2,3-CZ

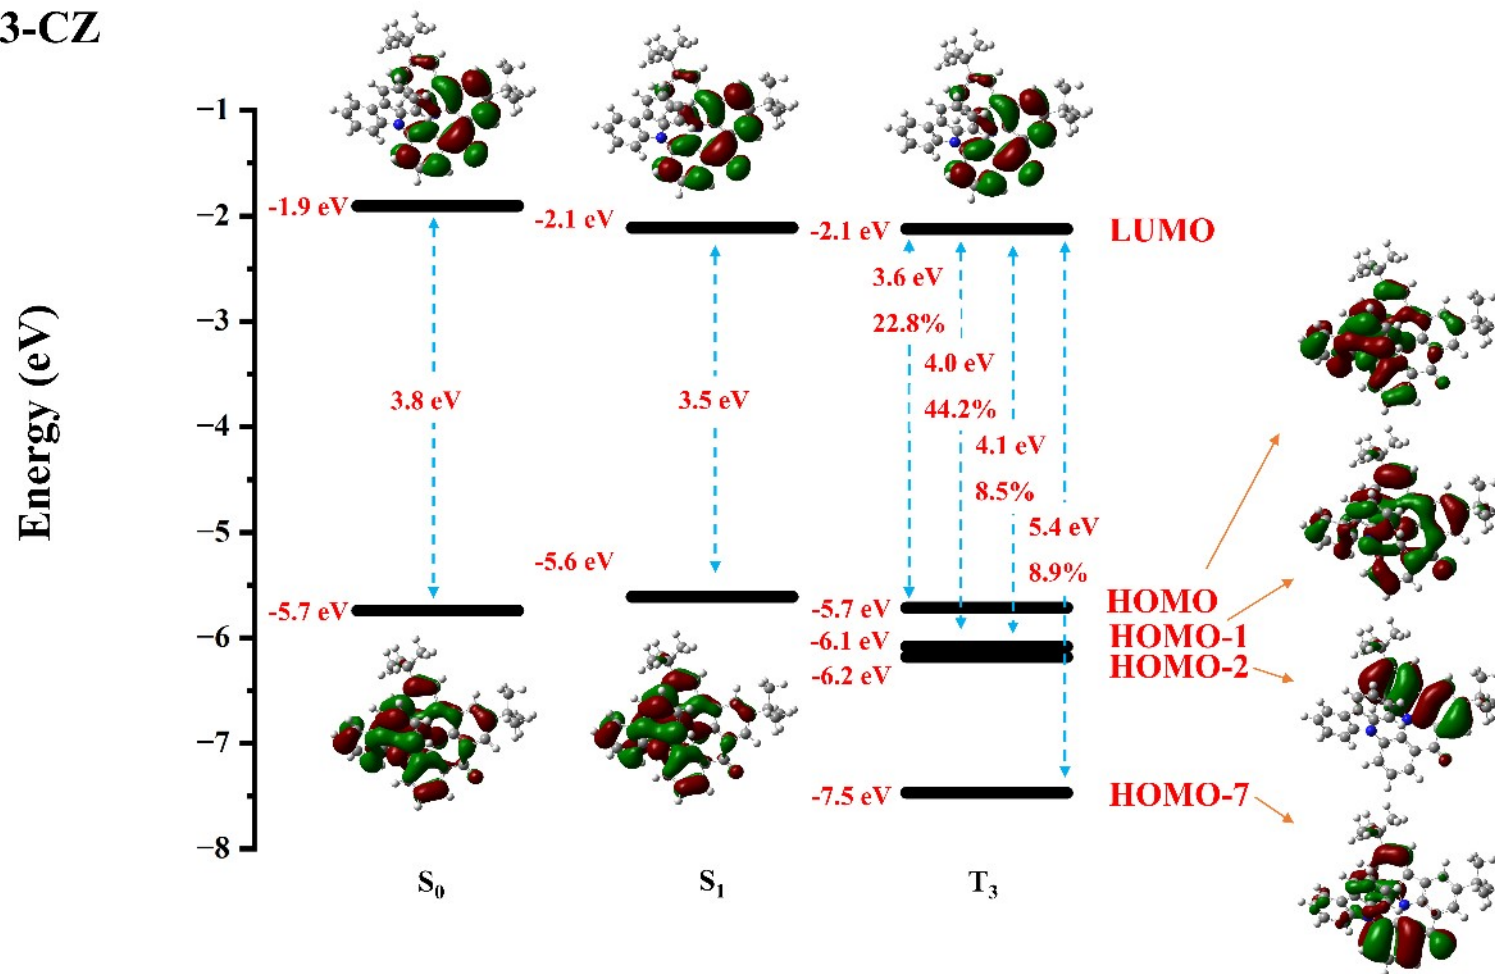

Figure S4. The orbital transition information for 2,3-CZ of the  $S_0$ ,  $S_1$  and  $T_3$  states in toluene.

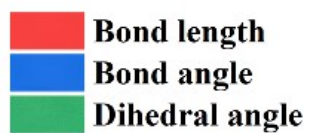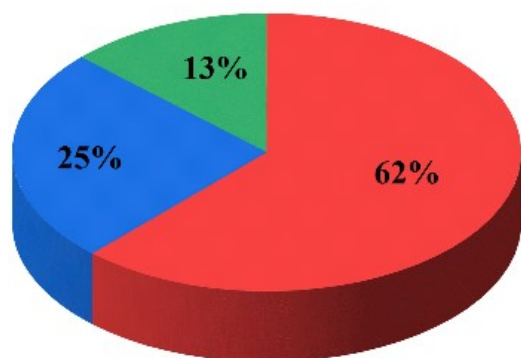

**2,3-POA**

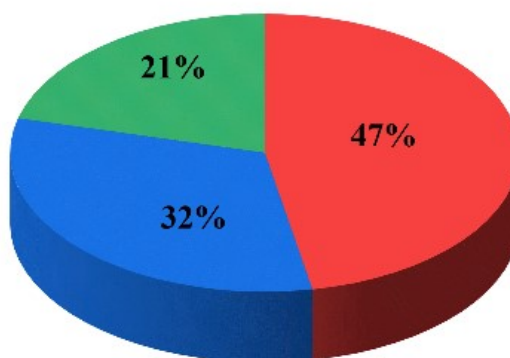

**2,3-DPA**

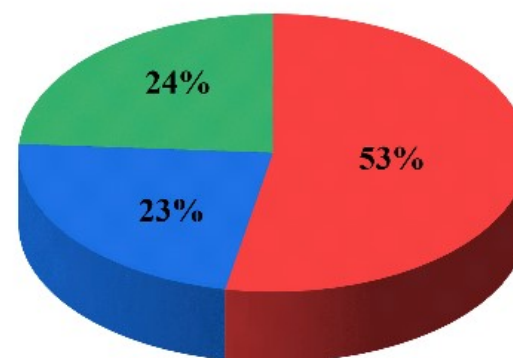

**2,3-CZ**

Figure S5. Contribution to the reorganization energy from bond length (red), bond angle (blue) and dihedral angle (green) in toluene for 2,3-POA, 2,3-DPA and 2,3-CZ, respectively.

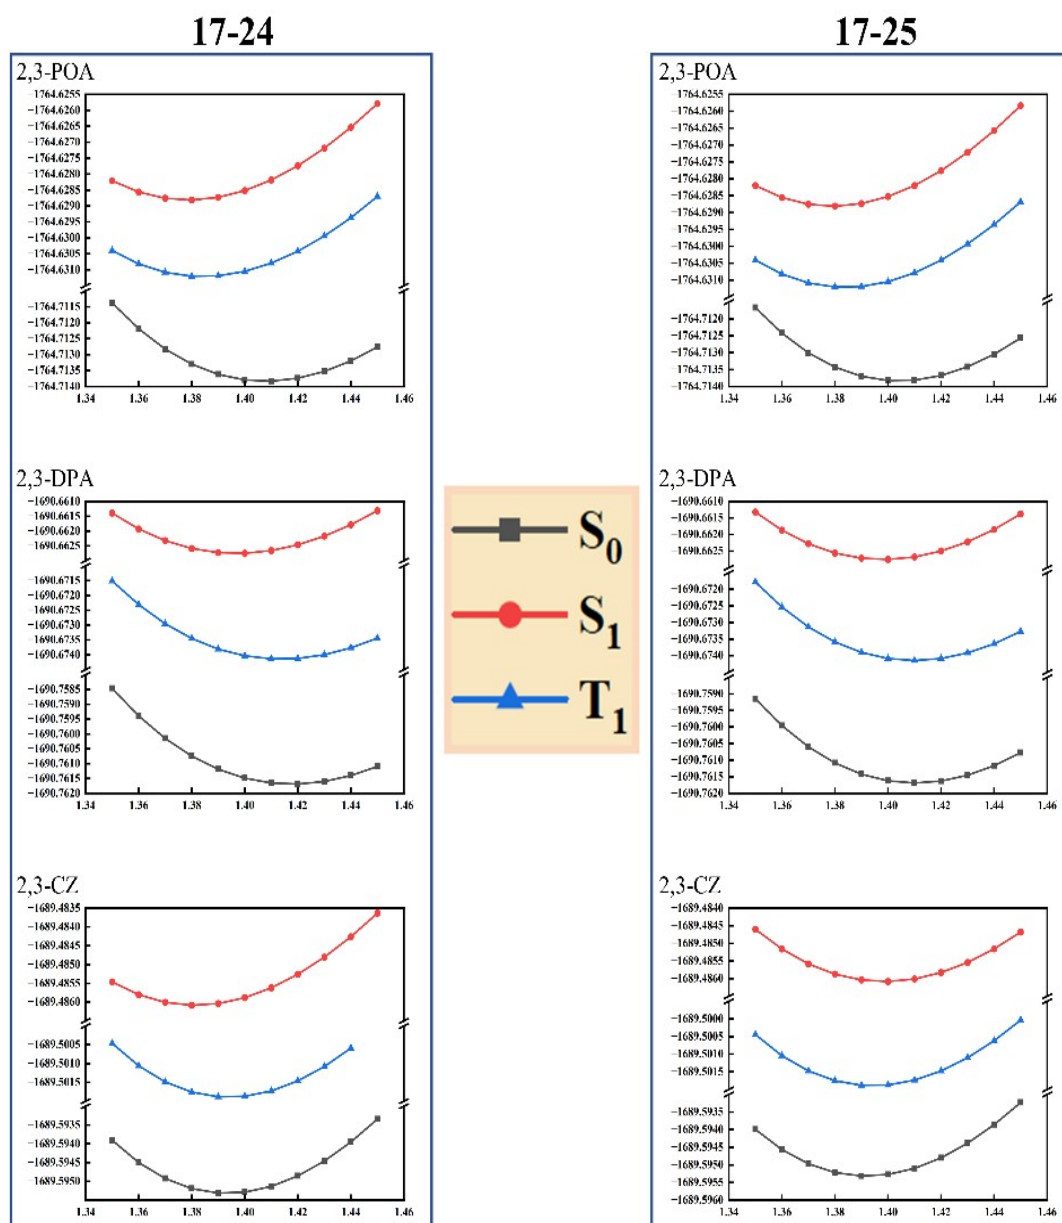

Figure S6. Potential energy curve of bond length between atom 17 and atom 24 as well as between atom 17 and atom 25 of  $S_0$ ,  $S_1$  and  $T_1$  for 2,3-POA, 2,3-DPA and 2,3-CZ in toluene.

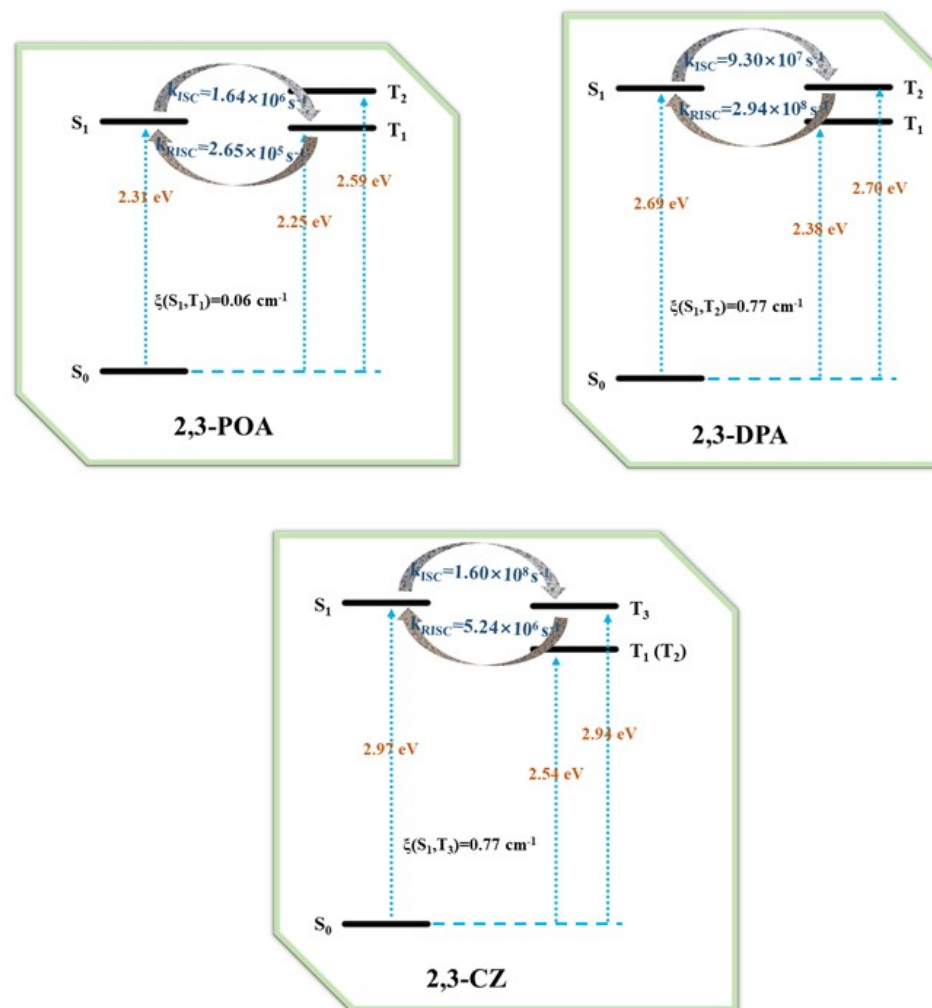

Figure S7. Adiabatic excitation energy diagrams for 2,3-POA, 2,3-DPA and 2,3-CZ in toluene. Corresponding SOC constants are also listed.



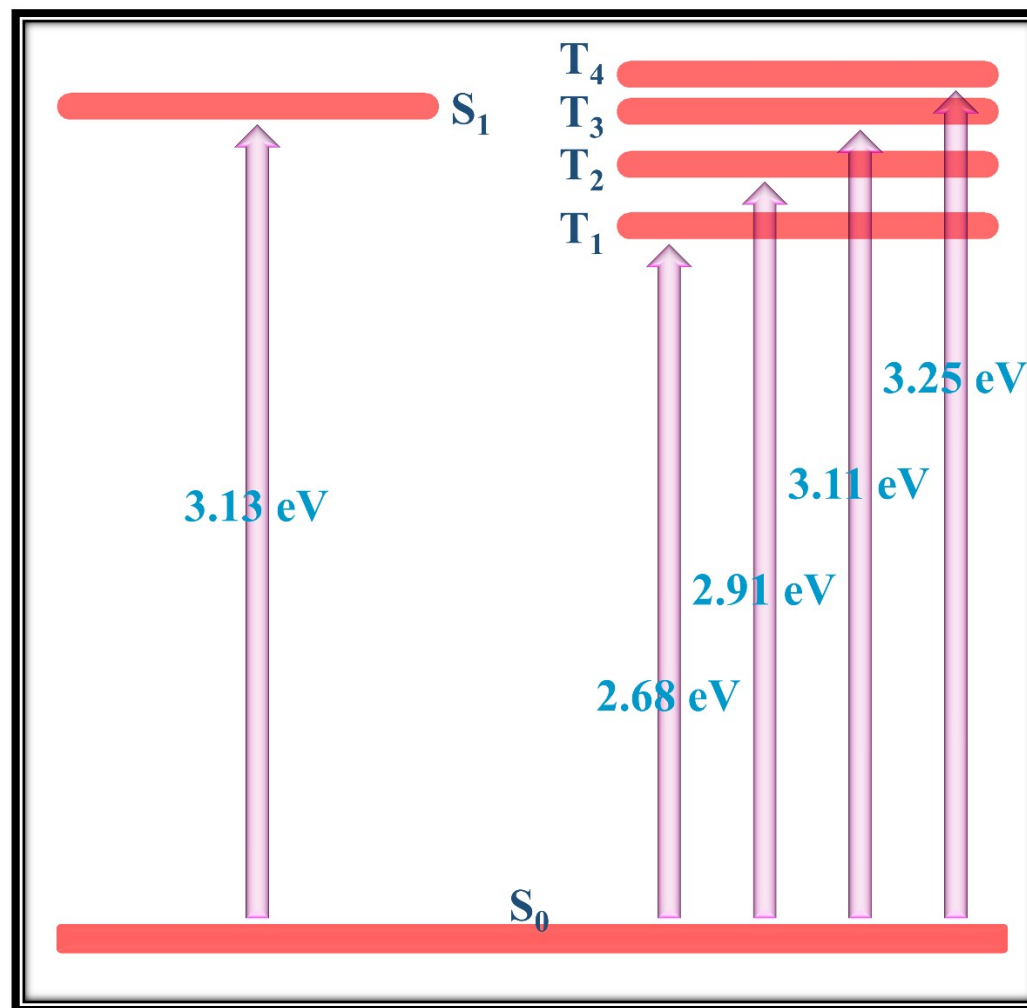

Figure S8. The vertical excitation energies of 2,3-CZ are being calculated.

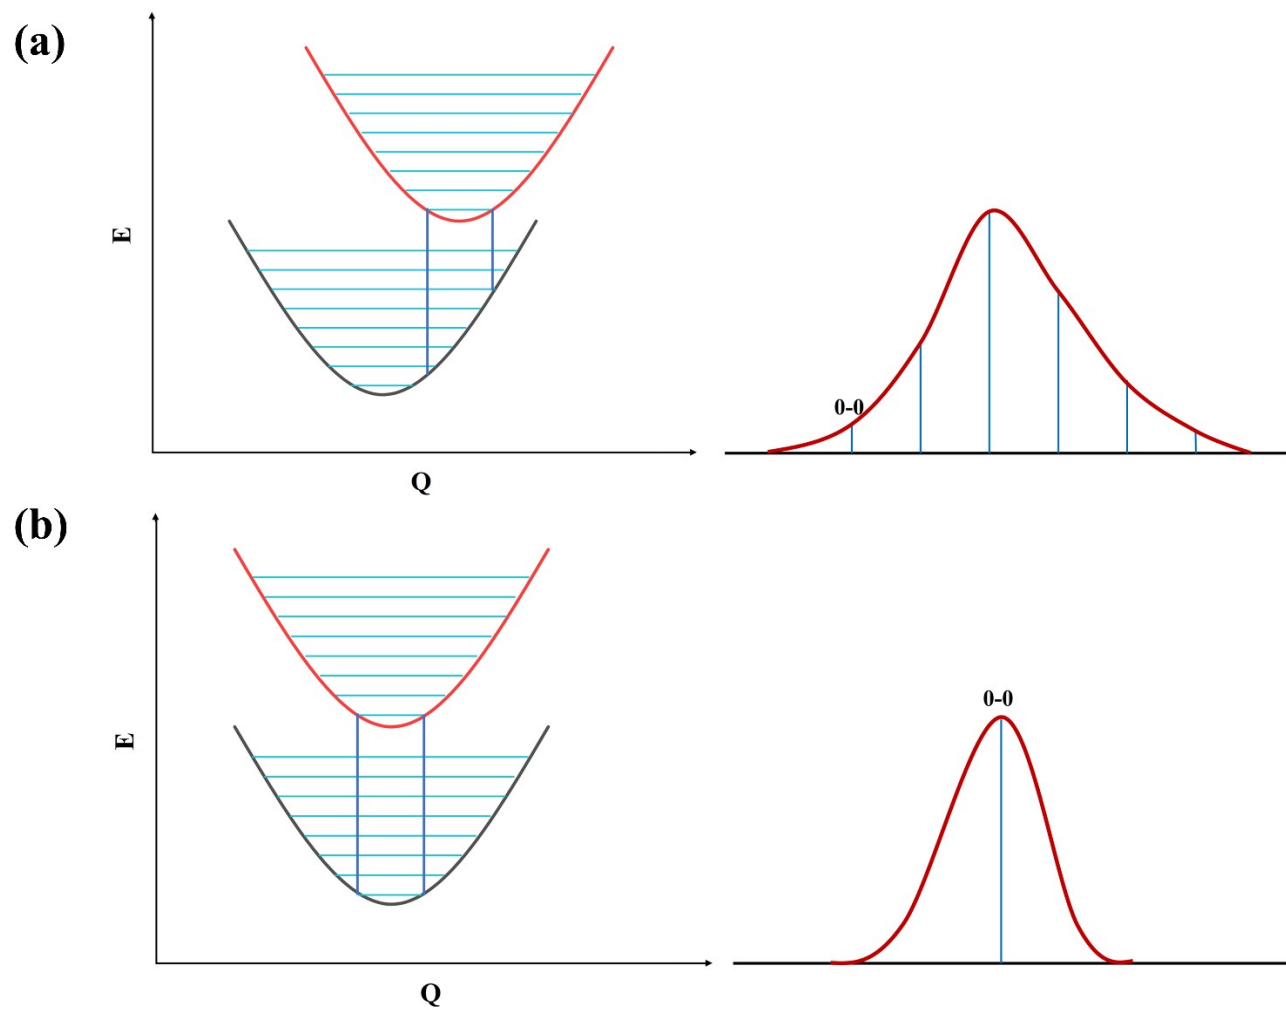

Figure S9. The vibrational energy levels and spectral diagrams.

Table S1. Reorganization energy contributions (cm<sup>-1</sup>) from bond length in donor of 2,3-POA, 2,3-DPA and 2,3-CZ.

| 2,3-POA       |           |                         | 2,3-DPA       |           |                         | 2,3-CZ        |           |                         |
|---------------|-----------|-------------------------|---------------|-----------|-------------------------|---------------|-----------|-------------------------|
| Atomic number |           | reorganization energies | Atomic number |           | reorganization energies | Atomic number |           | reorganization energies |
| <b>17</b>     | <b>24</b> | <b>122.460</b>          | <b>17</b>     | <b>24</b> | <b>64.232</b>           | <b>17</b>     | <b>24</b> | <b>19.066</b>           |
| <b>17</b>     | <b>25</b> | <b>92.516</b>           | <b>17</b>     | <b>25</b> | <b>25.189</b>           | 34            | 50        | 16.453                  |
| 35            | 53        | 68.732                  | 34            | 51        | 12.818                  | 50            | 58        | 15.821                  |
| 37            | 53        | 54.643                  | 24            | 35        | 10.261                  | 24            | 35        | 8.294                   |
| 55            | 62        | 46.800                  | 24            | 34        | 9.658                   | 36            | 53        | 7.081                   |
| 34            | 51        | 35.337                  | 51            | 60        | 8.475                   | 53            | 61        | 6.934                   |
| 36            | 55        | 29.718                  | 37            | 56        | 4.301                   | <b>17</b>     | <b>25</b> | <b>4.218</b>            |
| 24            | 35        | 28.779                  | 25            | 37        | 4.152                   | 24            | 34        | 3.775                   |
| 52            | 59        | 17.420                  | 36            | 55        | 3.754                   | 55            | 61        | 2.330                   |
| 56            | 62        | 15.861                  | 35            | 52        | 3.712                   | 34            | 36        | 1.802                   |
| 25            | 37        | 12.384                  | 25            | 36        | 2.584                   | 35            | 52        | 1.283                   |
| 24            | 34        | 12.099                  | 56            | 63        | 1.858                   | 25            | 36        | 0.898                   |
| 25            | 36        | 9.094                   | 52            | 60        | 0.448                   | 37            | 55        | 0.309                   |
| 37            | 56        | 1.548                   | 51            | 59        | 0.327                   | 52            | 59        | 0.231                   |
| 35            | 52        | 1.253                   | 52            | 61        | 0.311                   | 37            | 54        | 0.150                   |
| 34            | 50        | 0.463                   | 36            | 54        | 0.200                   | 35            | 51        | 0.146                   |
| 36            | 54        | 0.251                   | 56            | 64        | 0.180                   | 50            | 57        | 0.135                   |
| 52            | 60        | 0.211                   | 34            | 50        | 0.123                   | 55            | 62        | 0.098                   |
| 55            | 61        | 0.206                   | 35            | 53        | 0.088                   | 61            | 67        | 0.038                   |
| 59            | 67        | 0.167                   | 60            | 68        | 0.082                   | 53            | 60        | 0.034                   |
| 56            | 63        | 0.149                   | 63            | 69        | 0.040                   | 25            | 37        | -0.008                  |
| 62            | 68        | 0.115                   | 37            | 57        | -0.004                  | 52            | 58        | -0.042                  |
